# Supplementary material for: B cells inhibit bone formation in rheumatoid arthritis by suppressing osteoblast differentiation
Source: PubMed Central journal article supplement (PMC6277442; doi:10.1038/s41467-018-07626-8), 2018-12-03
Supplement: 41467_2018_7626_MOESM1_ESM.pdf [file 41467_2018_7626_MOESM1_ESM.pdf]

## **Supplementary Information**

**“B cells inhibit bone formation in rheumatoid arthritis  
by suppressing osteoblast differentiation”**

**Sun et al.**

## Supplementary Methods

1) CCL3-KO mice were obtained from Jackson Laboratories. The presence of the WT CCL3 allele was detected using the WT forward primer 5' - CTTGGGTGGAGAGGCTATTC -3' and WT reverse primer 5' - AGGTGAGATGACAGGAGATC -3'. The null CCL3 allele was detected using the Mut forward primer 5' - ATGAAGGTCTCCACCACTGC -3' and the Mut reverse primer 5' - AGTCAACGATGAATTGGCG -3. TNF-Tg male mice and CCL3-KO female mice were crossed to generate TNF-Tg/CCL3+/- double-mutant mice, and TNF-Tg/CCL3+/- males and CCL3-KO females were crossed to generate TNF-Tg/CCL3-KO mice.

2) TNF-KO mice were obtained from Jackson Laboratories and are maintained in the CMSR. The common forward primer for both WT and Mut is 5' - TAGCCAGGAGGGGAGAACAGA -3. The presence of the WT TNF allele was detected using the WT reverse primer 5' - AGTGCCTCTTCTGCCAGTTC -3. The null TNF allele was detected using the Mut reverse primer 5' - CGTTGGCTACCCGTGATATT -3'. TNF-Tg male mice and TNF-KO female mice were crossed to generate TNF-Tg/TNF+/- double-mutant mice, and

TNF-Tg/TNF<sup>+/-</sup> males and TNF-KO females were crossed to generate TNF-Tg/TNF-KO mice.

3) CCL3-KO mice and TNF-KO mice were crossed to generate CCL3<sup>+/-</sup>/TNF<sup>+/-</sup> double-mutant mice, and CCL3<sup>+/-</sup>/TNF<sup>+/-</sup> males and females were crossed to generate CCL3-KO/TNF-KO mice. TNF-Tg/CCL3-KO male mice and CCL3-KO/TNF-KO female mice were crossed to generate TNF-Tg/CCL3-KO/TNF<sup>+/-</sup> triple-mutant mice, and TNF-Tg/CCL3-KO/TNF<sup>+/-</sup> males and CCL3-KO/TNF-KO females were crossed to generate TNF-Tg/CCL3-KO/TNF-KO mice.

4) For the ectopic bone formation assay, MPCs were isolated from WT or GFP transgenic mice and cultured to a third passage. BM B cells from 4-month-old WT, TNF-Tg, TNF-Tg/CCL3-KO, TNF-Tg/TNF-KO, TNF-Tg/CCL3-KO/TNF-KO or mTmG mice were purified with anti-CD19 beads. Gelfoam (Pfizer) was loaded with  $1 \times 10^6$  MPCs and  $1 \times 10^7$  B cells, and subcutaneously implanted into the dorsal surfaces of 2-month-old NOD-SCID mice. Briefly, after anesthetizing mice, skin was cleaned with iodine and a ~2 cm incision was made perpendicular to the spine

on both sides of the dorsal surface of the mice. Sponges were inserted into the pocket (up to 3 sponges in 1 pocket) and the incision was closed with sutures. Every NOD-SCID mouse carried 6 sponges, including B cells from WT, TNF-Tg, TNF-Tg/CCL3-KO, TNF-Tg/TNF-KO, or TNF-Tg/CCL3-KO/TNF-KO mice plus WT MPCs, or mTmG BM B cells with MPCs from GFP transgenic mice. The implants were harvested 4 weeks after implantation, processed through paraffin and stained with H&E and Goldner's Trichrome.

# Supplementary Figures

## Supplementary Figure 1

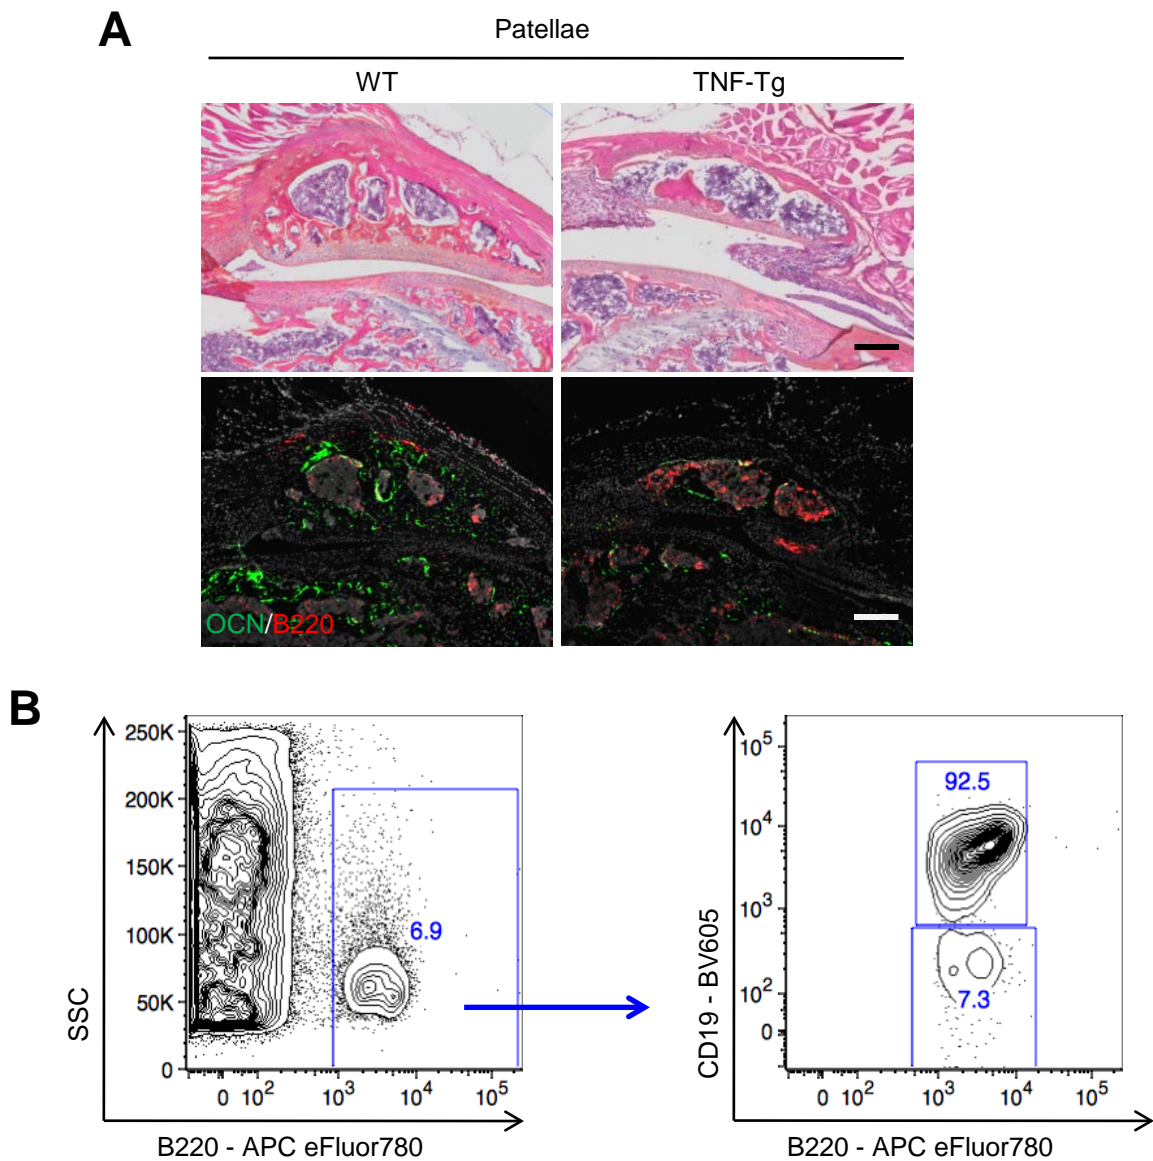

### Supplementary Fig. 1. B cell distribution in patellae and subchondral bone marrow/synovial B220+ B cells confirmation.

(A) Frozen sections of patellae from a 6-m-old TNF-Tg and WT mice were H&E-stained (upper panel), and adjacent sections (lower panel) were subjected to IF with anti-B220 Ab for B cells (red) and anti-osteocalcin (OCN) Ab for osteoblasts (OBs, green). Bar =200 $\mu$ m. (B) Flow cytometry analysis of subchondral bone marrow/synovial (SBM) cells from a TNF-Tg mouse revealed that the B220+ cells are indeed CD19+ B cells. SBM cells were isolated as noted in the Methods.

## Supplementary Figure 2

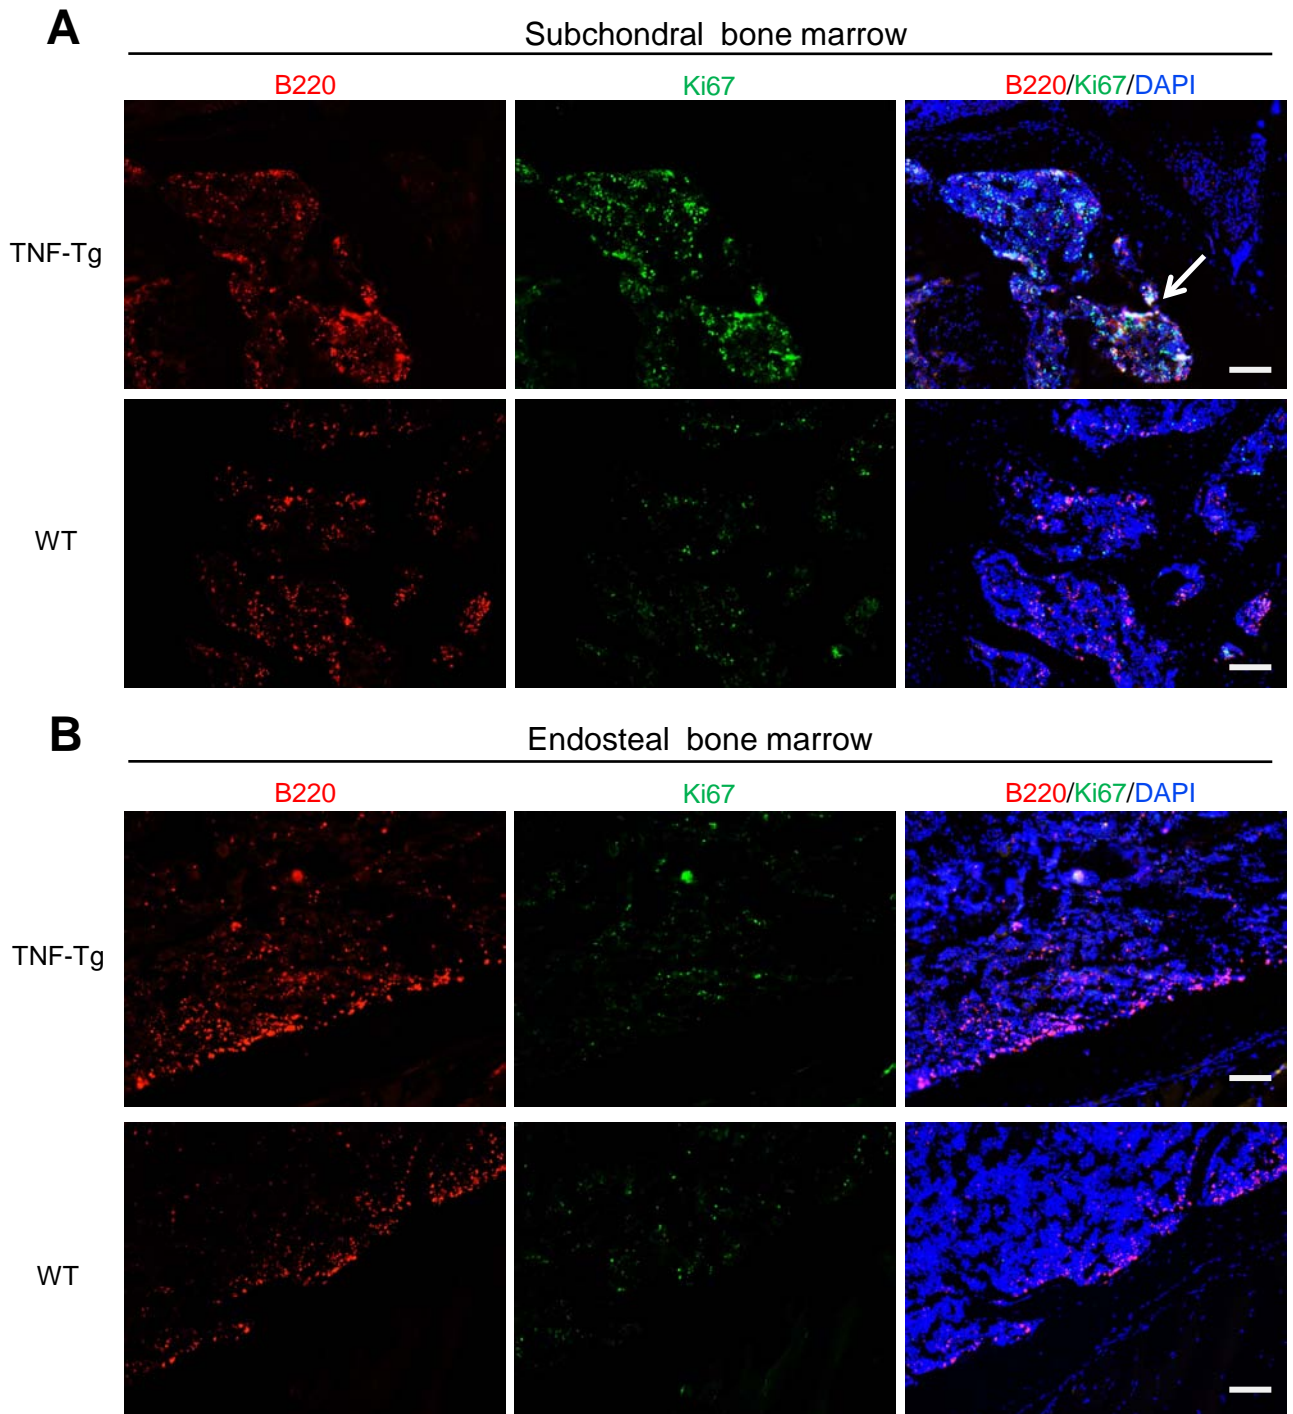

**Supplementary Fig. 2. B cells in the subchondral bone marrow of TNF-Tg mice have increased proliferation.**

Frozen sections of leg including knee joints from 5-m-old TNF-Tg and WT mice were subjected to IF with anti-B220 Ab for B cells (red) and anti-Ki67 Ab for cell proliferation (green). Representative images of subchondral bone marrow (**A**) and endosteal bone marrow (**B**) were shown. There are multiple areas of dual staining as highlighted by the arrow in one section. Bar =200 $\mu$ m. 5 mice and their controls were included in each experiment.

## Supplementary Figure 3

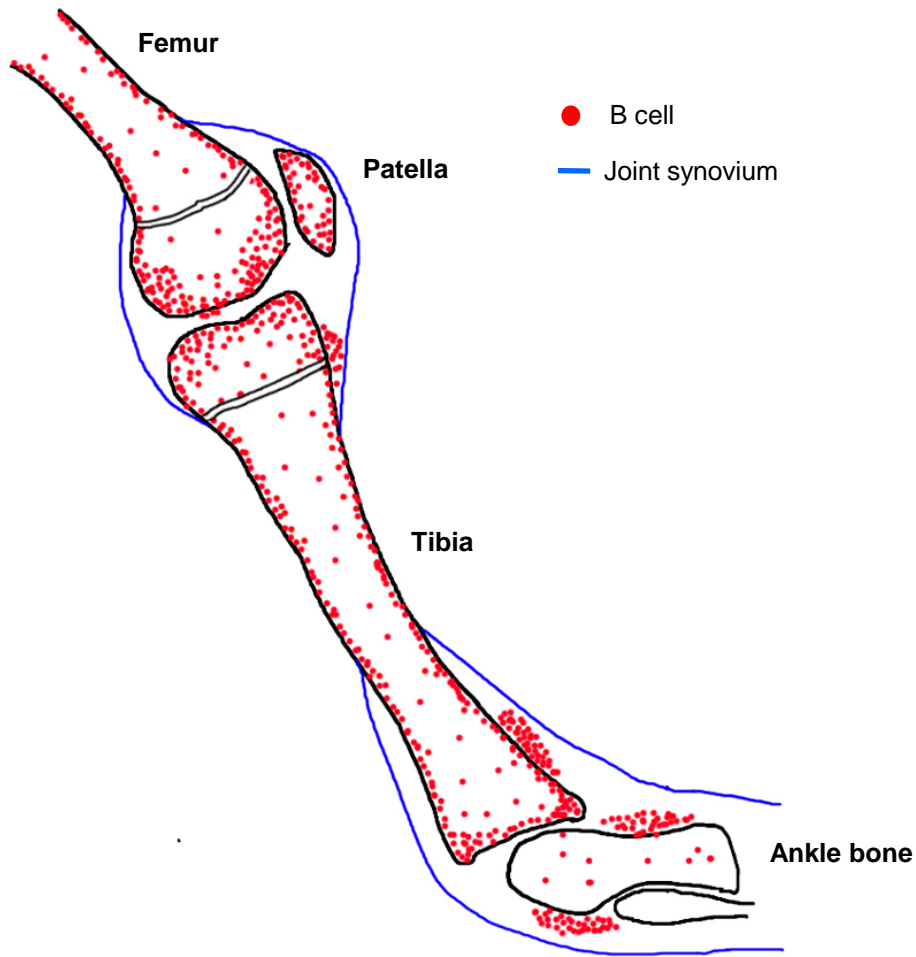

**Supplementary Fig. 3. B cell distribution in long bones and joints of a TNF-Tg mouse.** A cartoon showing B cell distribution in long bones and joints of a 6-m-old TNF-Tg mouse, based on IF staining with anti-B220 Ab.

# Supplementary Figure 4

○ WT-BM ● Tg-BM ▲ Tg-SBM

## A. Bone marrow

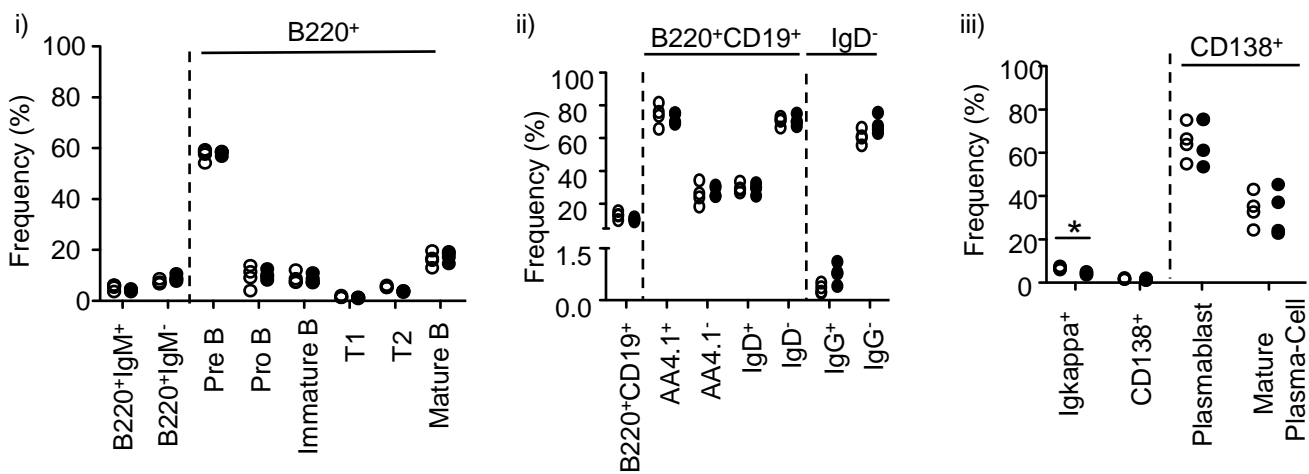

## B. Blood

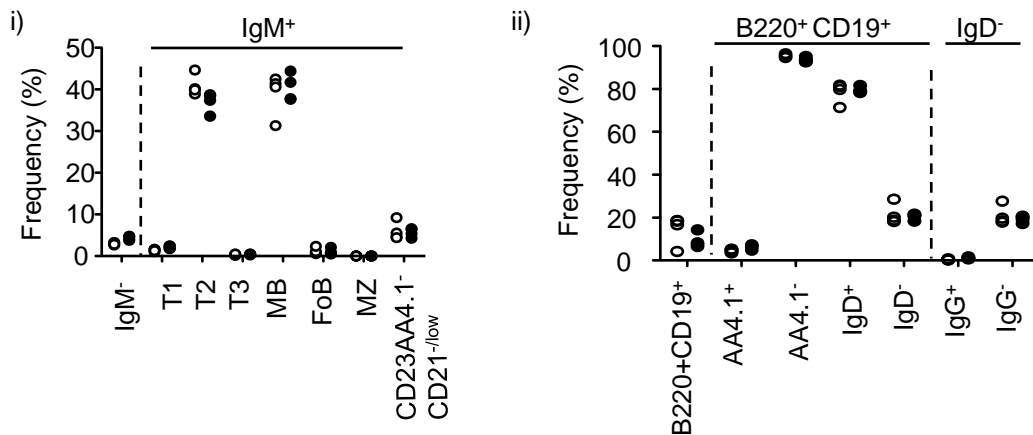

## C. Subchondral bone marrow/synovium

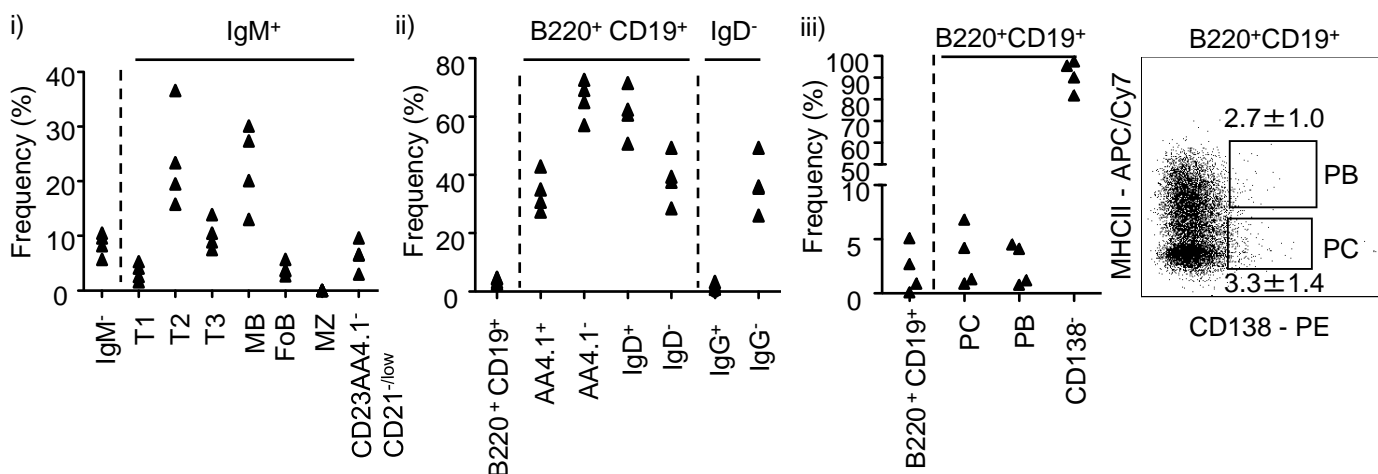



# Supplementary Figure 4

## D. Gating strategies used for A-i

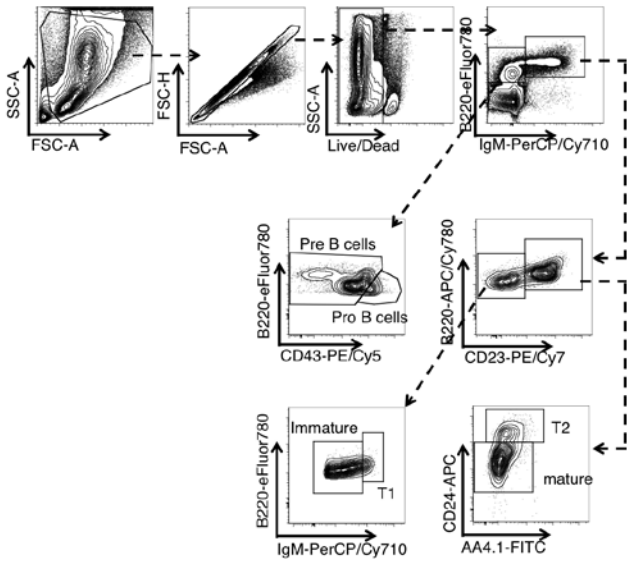

## E. Gating strategies used for A-ii, B-ii, C-ii

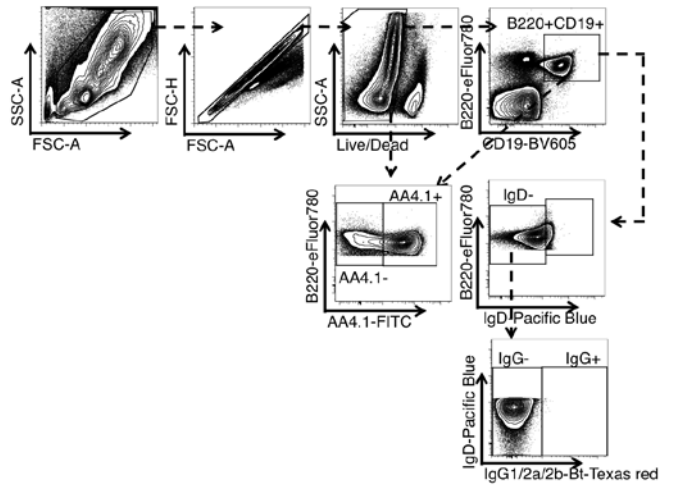

## F. Gating strategies used for A-iii

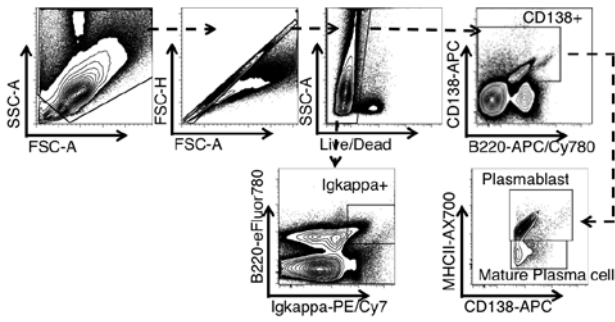

## G. Gating strategies used for B-i, C-i

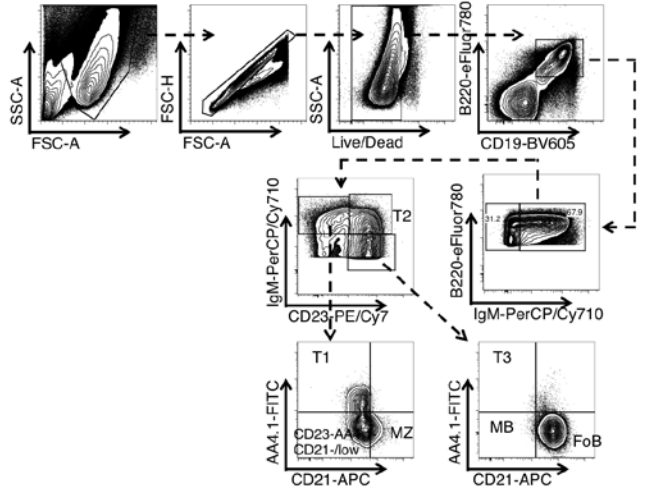

**Supplementary Fig. 4. Characterization of B cells in bone marrow, blood and subchondral bone marrow/synovium of TNF-Tg mice by flow cytometry.**

Total cells from bone marrow (BM), blood and subchondral bone marrow/synovium were stained with various B cell markers and the frequencies of B cell populations were enumerated by flow cytometry. 6-m-old mice were used. N=4 mice per group. **(A)** Frequency of B cell populations in the BM of TNF-Tg and WT mice. i) Frequencies of Pre B (B220<sup>+</sup>IgM<sup>-</sup>CD43<sup>low</sup>), Pro B (B220<sup>+</sup>IgM<sup>-</sup>CD43<sup>+</sup>), Immature B (B220<sup>+</sup>IgM<sup>+</sup>CD23<sup>-</sup>), Transitional 1 (T1=B220<sup>+</sup>AA4.1<sup>+</sup>IgM<sup>hi</sup>CD23<sup>+</sup>), Transitional 2 (T2=B220<sup>+</sup>IgM<sup>+</sup>AA4.1<sup>+</sup>CD23<sup>+</sup>CD24<sup>hi</sup>) and Mature B (B220<sup>+</sup>IgM<sup>+</sup>AA4.1<sup>-</sup>CD23<sup>+</sup>CD24<sup>low</sup>) were expressed as % of B220<sup>+</sup> cells. ii) Frequencies of B cells based on AA4.1 or IgD expression. IgD<sup>-</sup> cells were further examined for IgG expression. iii) Frequencies of Igκ<sup>+</sup> or CD138<sup>+</sup> plasma cells in the BM. Plasmablast and mature plasma cell frequencies were determined within CD138<sup>+</sup> cells. **(B)** Frequencies of B cell populations in blood from TNF-Tg and WT mice. i) IgM<sup>+</sup> B cells were analyzed for transitional 1 (T1= B220<sup>+</sup>CD19<sup>+</sup>IgM<sup>hi</sup>CD23<sup>-</sup>AA4.1<sup>+</sup>CD21<sup>-/low</sup>), transitional 2 (T2=B220<sup>+</sup>CD19<sup>+</sup>IgM<sup>hi</sup>CD23<sup>+</sup>AA4.1<sup>+</sup>CD21<sup>low</sup>), transitional 3 (T3=B220<sup>+</sup>CD19<sup>+</sup>IgM<sup>low</sup>CD23<sup>+</sup>AA4.1<sup>+</sup>CD21<sup>low</sup>), mature B cell (MB=B220<sup>+</sup>CD19<sup>+</sup>IgM<sup>low</sup>CD23<sup>+</sup>AA4.1<sup>-</sup>CD21<sup>low</sup>), follicular B cell (FoB=B220<sup>+</sup>CD19<sup>+</sup>IgM<sup>low</sup>CD23<sup>+</sup>AA4.1<sup>-</sup>CD21<sup>int</sup>) and marginal zone B cell (MZ=B220<sup>+</sup>CD19<sup>+</sup>IgM<sup>low</sup>CD23<sup>+</sup>AA4.1<sup>-</sup>CD21<sup>hi</sup>) as % of B220<sup>+</sup>CD19<sup>+</sup> cells. ii) Frequencies of blood B cells based on AA4.1 or IgD expression. IgG expression was determined in IgD<sup>-</sup> B cells. **(C)** Frequencies of B cell populations in subchondral bone marrow/synovium from TNF-Tg mice. i) Frequencies for B cell populations based on IgM expression. IgM<sup>+</sup> B cells were further analyzed for B cell populations as described for blood. ii) Similar to blood, B cells from subchondral bone marrow/synovium were characterized using AA4.1 or IgD and IgG expression were examined within the IgD<sup>-</sup> fraction. iii) Further characterization of SBM/synovial B cells reveals very few CD138<sup>+</sup> plasma cells. B220<sup>+</sup>CD19<sup>+</sup> B cells were gated and the expression of CD138 and MHCII examined to define plasma cells (CD138<sup>+</sup>MHCII<sup>low</sup>) and plasmablasts (CD138<sup>+</sup>MHCII<sup>high</sup>). The dot plot represents the overlay of 4 separate mice, with the % +/- SEM. **(D)** Gating strategies used for A-i. **(E)** Gating strategies used for A-ii, B-ii, C-ii. **(F)** Gating strategies used for A-iii. **(G)** Gating strategies used for B-i, C-i.

# Supplementary Figure 5

## A. Spleen

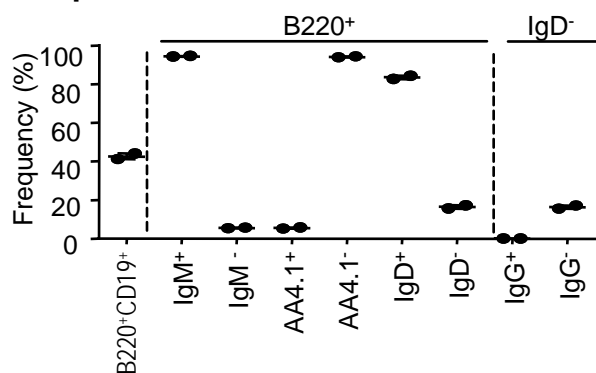

## B. BM

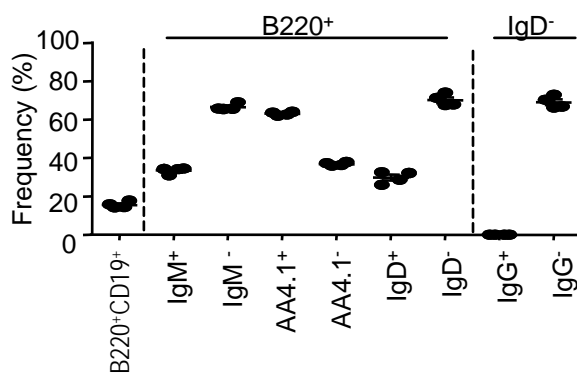

## C. Blood

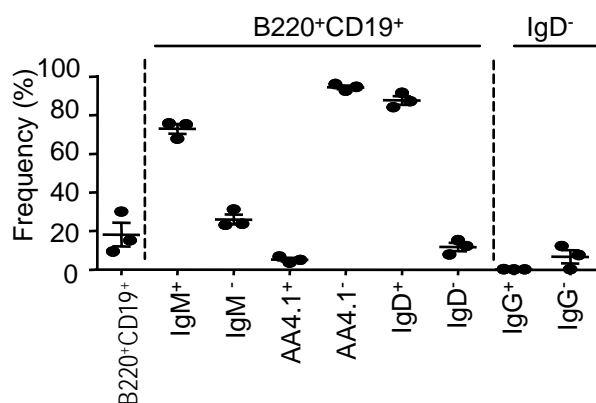

## D. Subchondral bone marrow/synovium

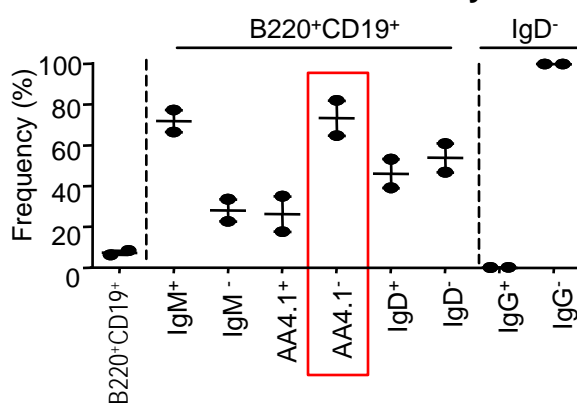

## E

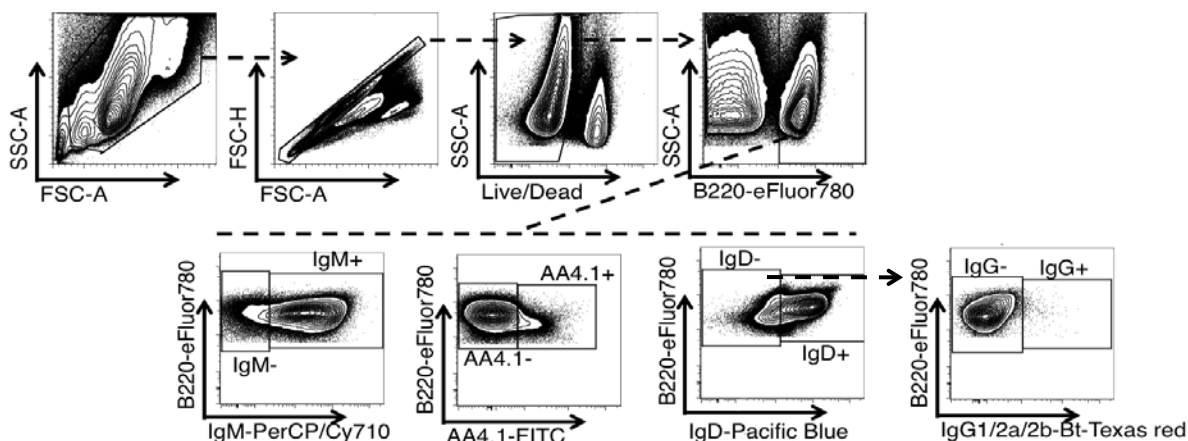

### Supplementary Fig. 5. Direct comparison by flow cytometry of B cells in the TNF-Tg mouse in the spleen, blood, total bone marrow, and subchondral bone marrow /synovium.

Total cells from spleen, bone marrow (BM), blood and subchondral BM/synovium were stained with various B cell markers and the frequencies of B cell populations were enumerated by flow cytometry. 6-m-old TNF-Tg mice were used. N=2 or 3 mice per group. (A) Frequency of B cell populations in the spleen. (B) Frequency of B cell populations in the BM. (C) Frequency of B cell populations in the blood. (D) Frequency of B cell populations in the subchondral BM/synovium. The subchondral BM/synovial B cell distribution is distinct compared to total BM with an enrichment of more mature B cells (80% AA4.1<sup>-</sup> compared to 40% of the total BM B cells in the red rectangle, 50% vs. 30% IgD<sup>+</sup>, 70% vs. 35% IgM<sup>+</sup>). (E) Gating strategies used for A-D.

## Supplementary Figure 6

**A**

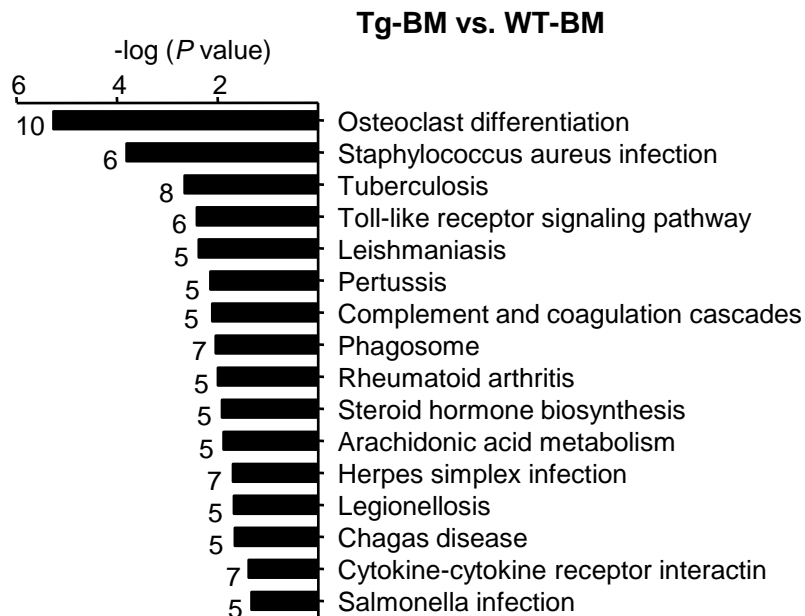

**B**

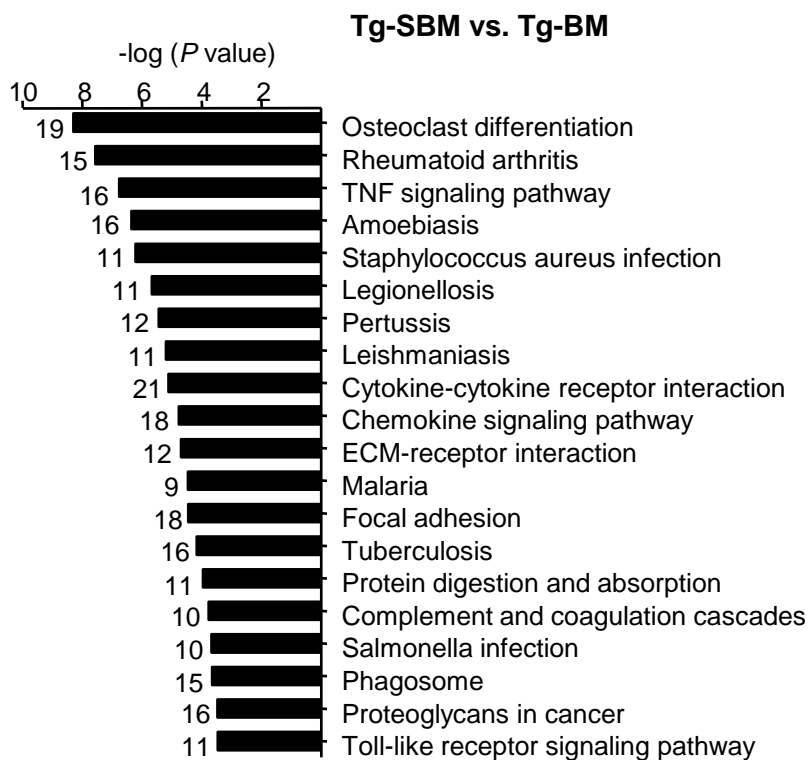

### Supplementary Fig. 6. KEGG pathway analysis.

Bar graphs show the KEGG pathway analysis according to the value of  $-\log(p \text{ value})$  for (A) BM comparison (Tg-BM vs. WT-BM) and (B) Tg comparison (Tg-SBM vs. Tg-BM); the number besides bar indicates the number of contigs concerned. BM comparison is shown for  $p$  value match of  $< 0.05$  and  $n \geq 5$ ; Tg comparison are shown for  $p$  value match of  $< 0.001$  and  $n \geq 5$ .

## Supplementary Figure 7

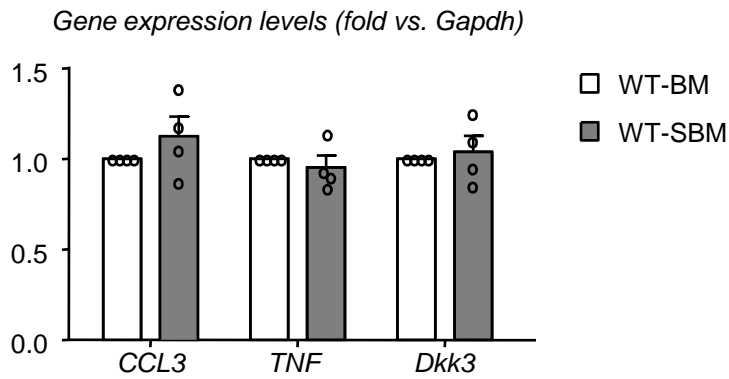

### Supplementary Fig. 7. Expression of genes in B cells from WT BM vs. WT SBM.

B cells from WT BM (WT-BM) and subchondral BM (WT-SBM) were purified with magnetic beads conjugated with anti-CD19. qPCR was performed to compare the expression levels of *CCL3*, *TNF* and *Dkk3*, N=4 independent experiments.

## Supplementary Figure 8

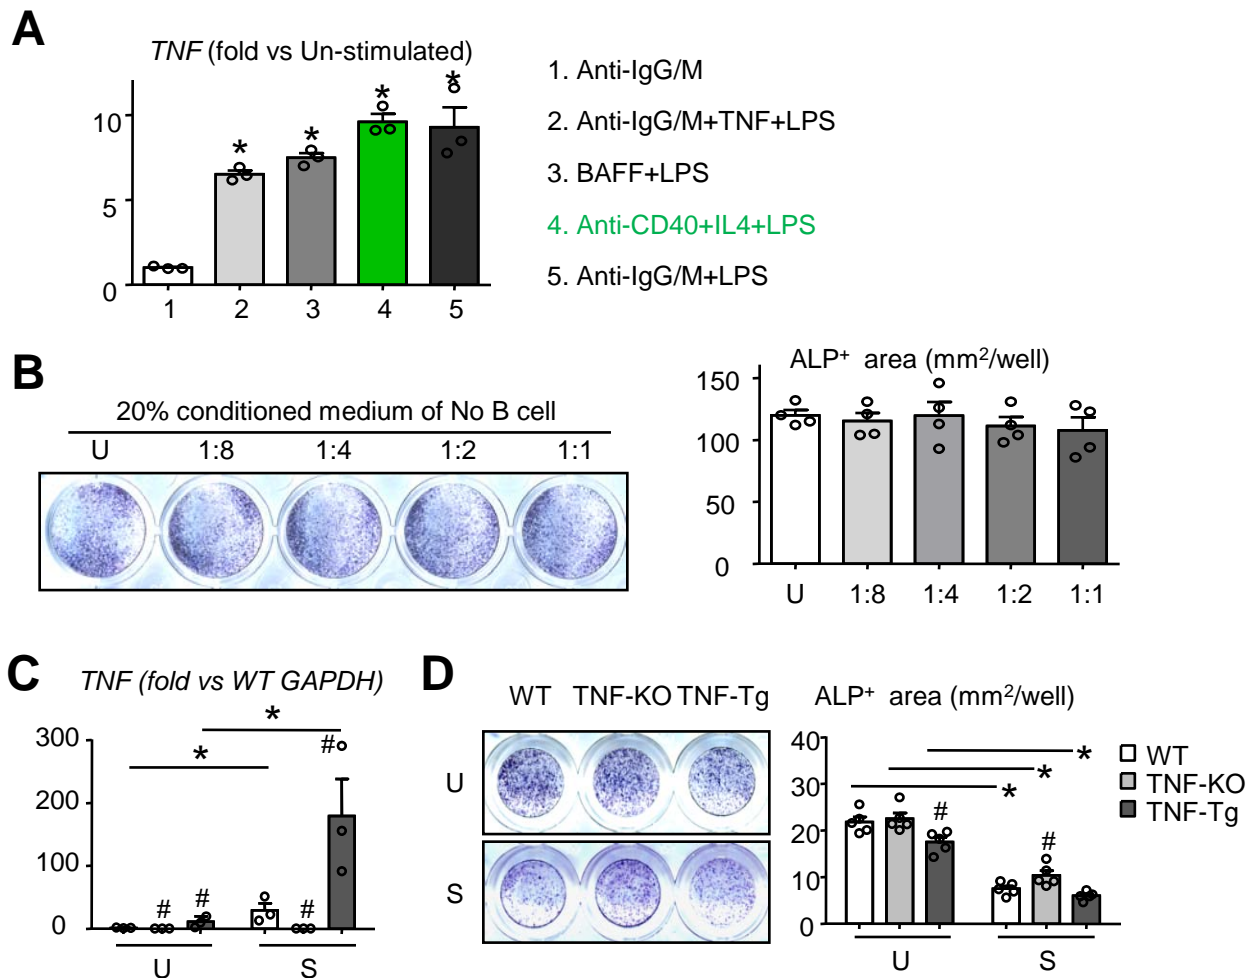

### Supplementary Fig. 8. B cells inhibit osteoblast differentiation in RA partly by secreting TNF.

(A) WT BM B cells were purified with magnetic beads conjugated with anti-CD19 Ab and cultured with various stimulatory reagents, as indicated for 48 hours. Expression of *TNF* mRNA was assessed by qPCR. Anti-CD40+IL4+LPS was the best stimulation cocktail and was used for subsequent experiments. \* $p < 0.05$  vs. 1. (B) B cell culture medium was added with 1/8, 1/4, 1/2 and 1/1 dilutions of optimal cocktail concentrations (2.5  $\mu\text{g/ml}$  Anti-CD40+10ng/ml IL4+10  $\mu\text{g/ml}$  LPS), but without B cells. Mesenchymal precursor cells (MPCs) were cultured in OB-inducing medium + 20% of the above B cell media for 2 days. Culture plates were stained for ALP, and ALP<sup>+</sup> areas were measured. (C) Expression of *TNF* in stimulated (S) or un-stimulated (U) WT, TNF-KO and TNF-Tg BM B cells was measured by qPCR. Fold-changes were calculated by dividing TNF-Tg values by the value from WT cells. (D) Stimulated or un-stimulated WT, TNF-KO and TNF-Tg B cells were co-cultured with WT mesenchymal precursor cells in OB-inducing medium for 2 days. ALP<sup>+</sup> area was measured. \* $p < 0.05$  vs. U, #  $p < 0.05$  vs. WT. Each experiment was performed 3 to 5 times. Representative image and quantifications shown come from one independent experiment. All error bars represent s.e.m. One way ANOVA followed by Dunnett's post-hoc multiple comparisons was performed.

## Supplementary Figure 9

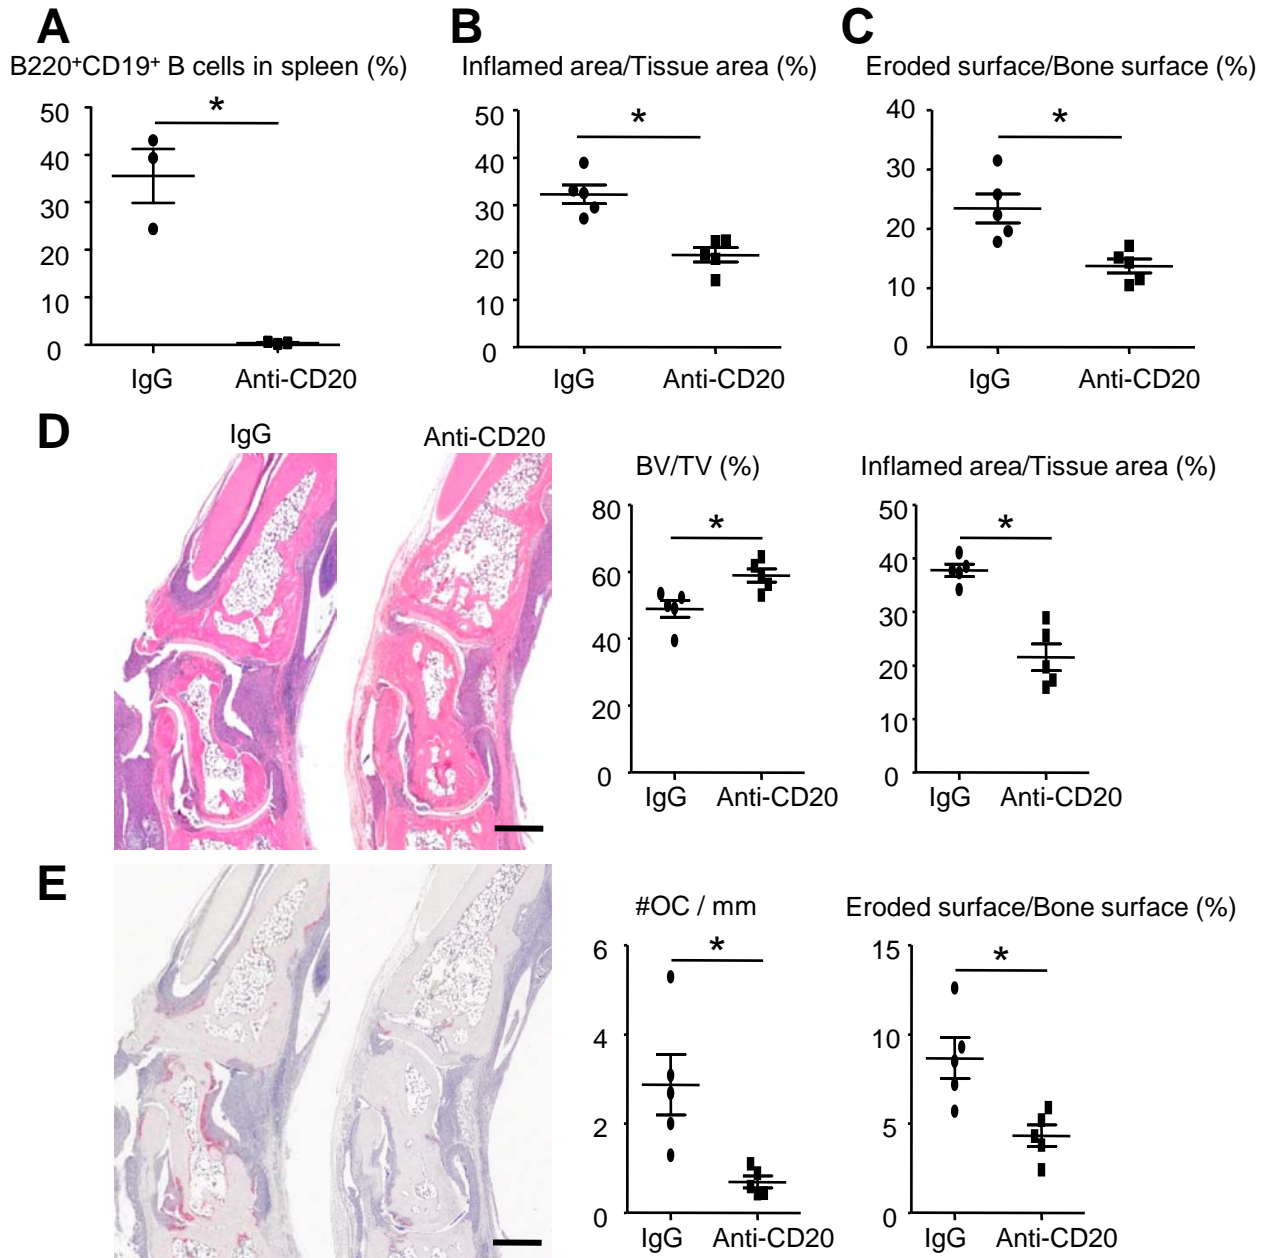

### Supplementary Fig. 9. B cell depletion therapy decreases knee and ankle inflammation of TNF-Tg mice.

2.5-month-old TNF-Tg mice and WT littermates were given murine anti-CD20 Ab (10 mg/kg/injection intravenously) or IgG once a week for 8 weeks. (A) Frequency of B220<sup>+</sup>CD19<sup>+</sup> B cells in the spleen of 3 mice was analyzed by flow cytometry. (B) Histomorphometric analyses of inflamed area/tissue area were performed on H&E-stained knee sections. (C) Eroded surface/bone surface was analyzed, based on TRAP-stained knee sections. (D) H&E-stained ankle sections and histomorphometric analyses of percentage of BV/TV and inflamed area/tissue area. (E) TRAP-stained sections, and the number of TRAP<sup>+</sup> OCs/mm bone surface and eroded surface/bone surface (%). Bar = 500µm. \*p<0.05 vs. IgG-treated mice. 5 mice and their controls were included in each experiment. These experiments were repeated once with representative images and quantifications shown. All error bars represent s.e.m. Two-tailed unpaired Student's t-test was performed.



# Supplementary Figure 10

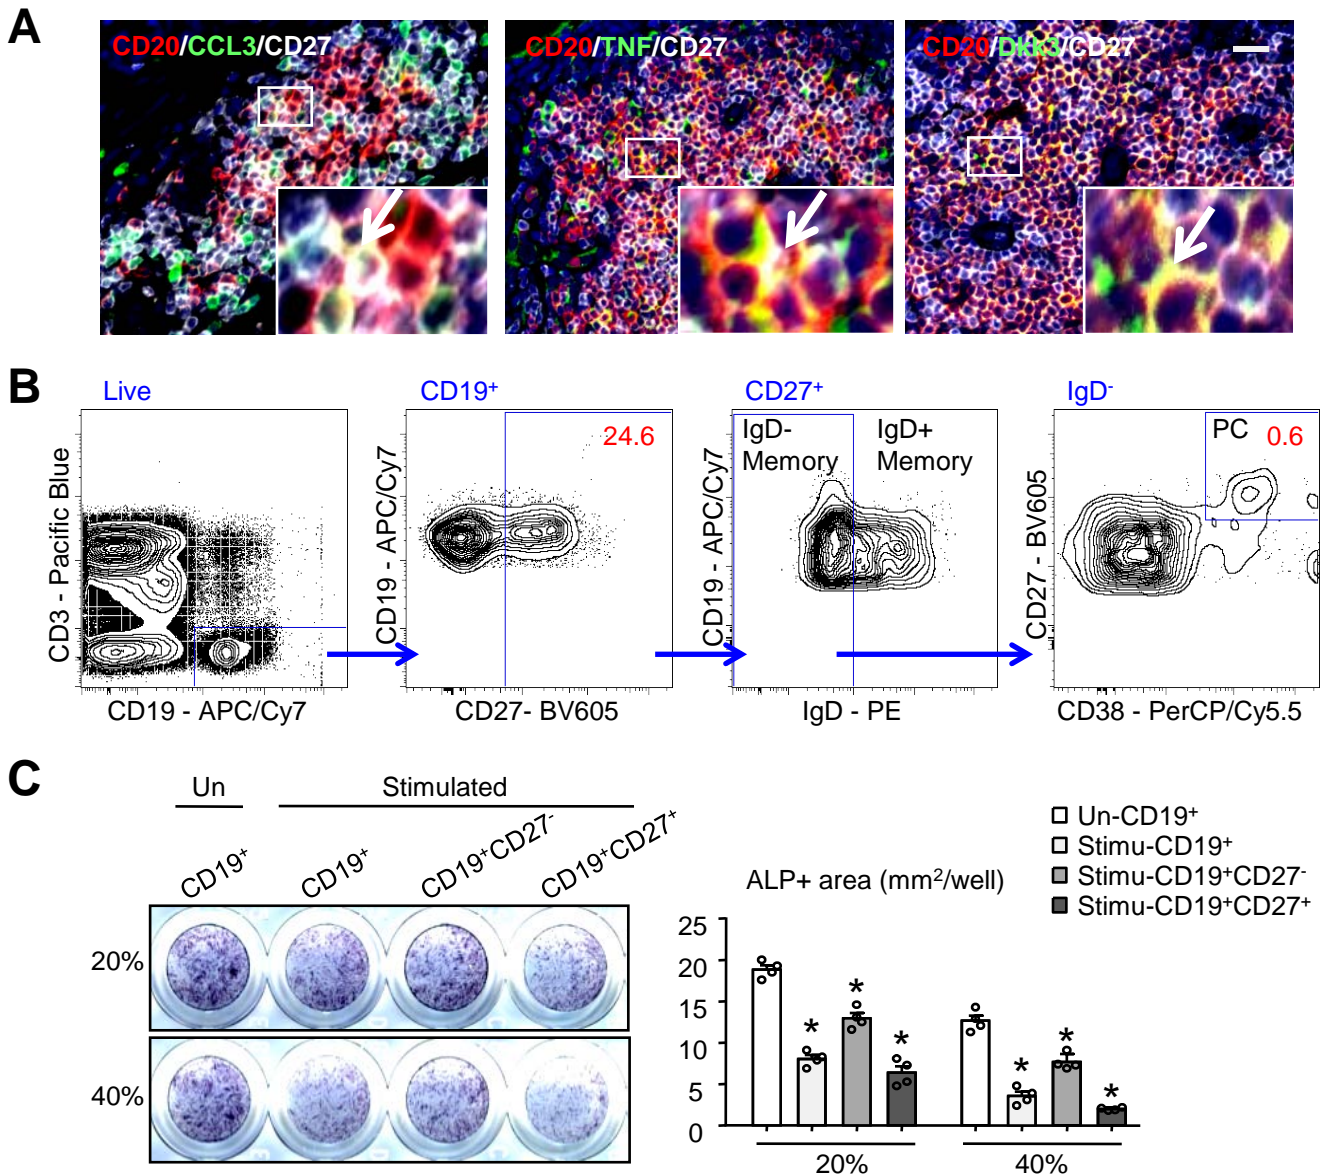

## Supplementary Fig. 10. Memory B cells from RA patients express OB inhibitors and inhibit OB differentiation.

(A) RA synovium was stained with Abs to CD20 (B cells), CD27 (memory B cells), CCL3, TNF and DKK3. White arrows indicate the cells with triple staining. Bar = 25µm. 3 patients and their controls were included. (B) Flow cytometry of peripheral blood B cells from an RA patient. The plots show that 24.6 % of B cells are CD27<sup>+</sup> (including CD27<sup>hi</sup> plasma cells). However, only a small fraction of these CD27<sup>+</sup> B cells are plasma cells, defined as CD19<sup>+</sup>IgD<sup>-</sup>CD27<sup>hi</sup>CD38<sup>hi</sup> (0.6% of B cells). (C) Blood B cells were purified with magnetic beads conjugated with anti-CD19 Ab and anti-CD27 Ab, and cultured with CpG2006+anti-Ig(A+G+M) for 4 hours. Conditioned medium (20% or 40%) from CD19<sup>+</sup>, CD19<sup>+</sup>CD27<sup>-</sup> and CD19<sup>+</sup>CD27<sup>+</sup> B cell cultures were added to human MSCs in OB-inducing medium for 3 days. ALP staining was performed. \*p<0.05 vs. Un-CD19<sup>+</sup>. All of these experiments were repeated at least once with representative data shown. All error bars represent s.e.m. One way ANOVA followed by Dunnett's post-hoc multiple comparisons was performed.



# Supplementary Figure 11

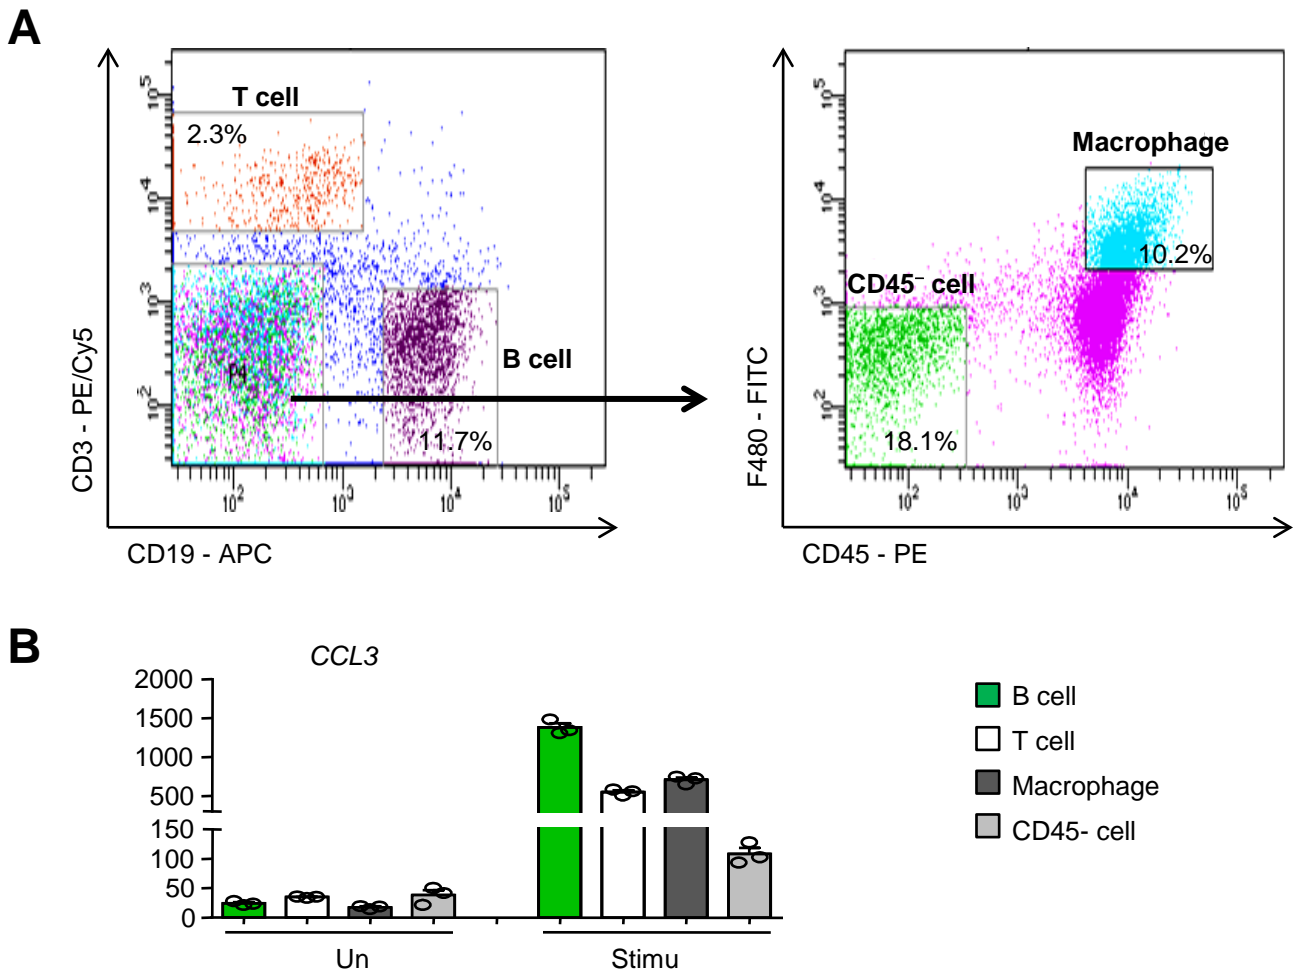

**Supplementary Fig. 11. Activated B cells from normal subjects produce similar levels of CCL3 as macrophages.**

Bone marrow cells from WT mice were cultured with or without the stimulatory cocktail (2.5 $\mu$ g/ml Anti-CD40+10ng/ml IL4+10 $\mu$ g/ml LPS) for 4 hours, and stained with anti-CD19 (B cell), anti-CD3 (T cell), anti-F480 (Macrophage) and anti-CD45 (for CD45<sup>-</sup> mesenchymal lineage cells) antibodies and subjected to flow cytometry sorting. **(A)** Gating strategies used for cell sorting. **(B)** Following flow cytometry sorting, RNA from all the cell types was harvested and subjected to qPCR, respectively. N=3 mice per group. Values were calculated based the equation=  $\frac{1}{2}$  CT (gene of interest) – CT (Gapdh) x100.

# Supplementary Figure 12

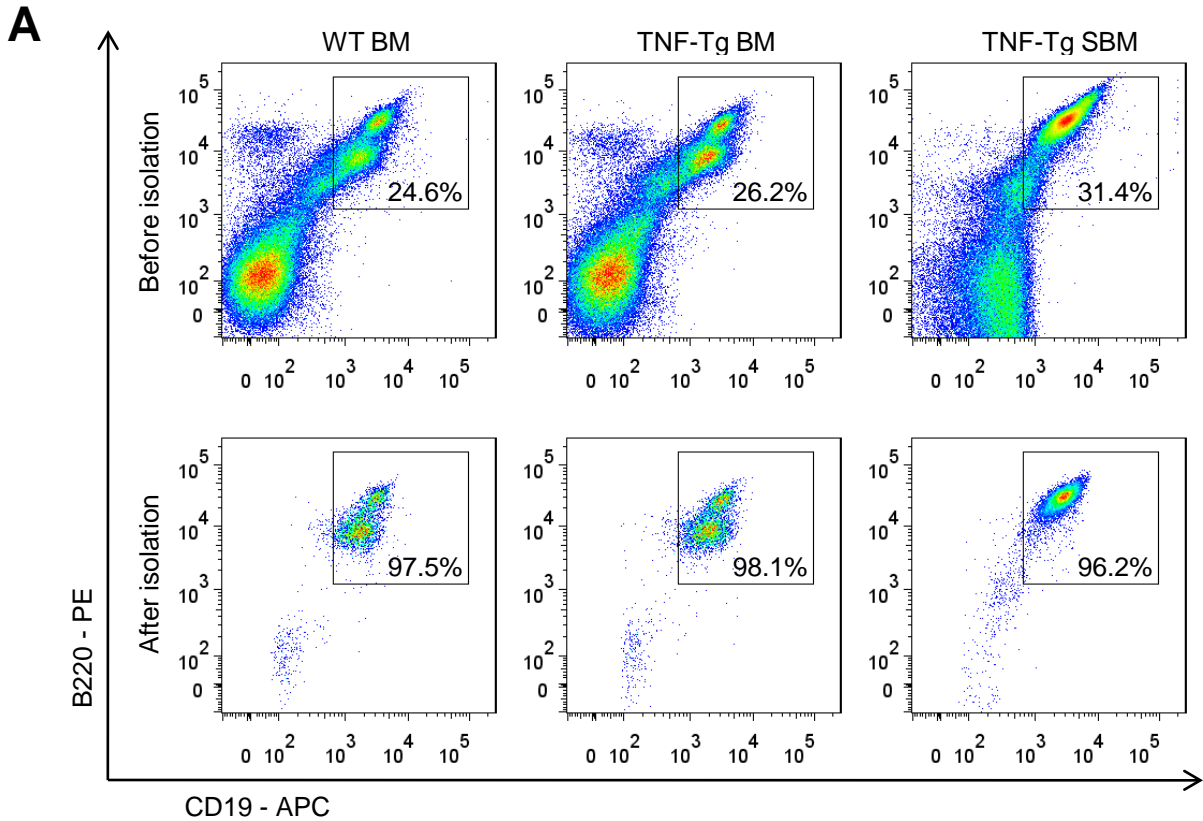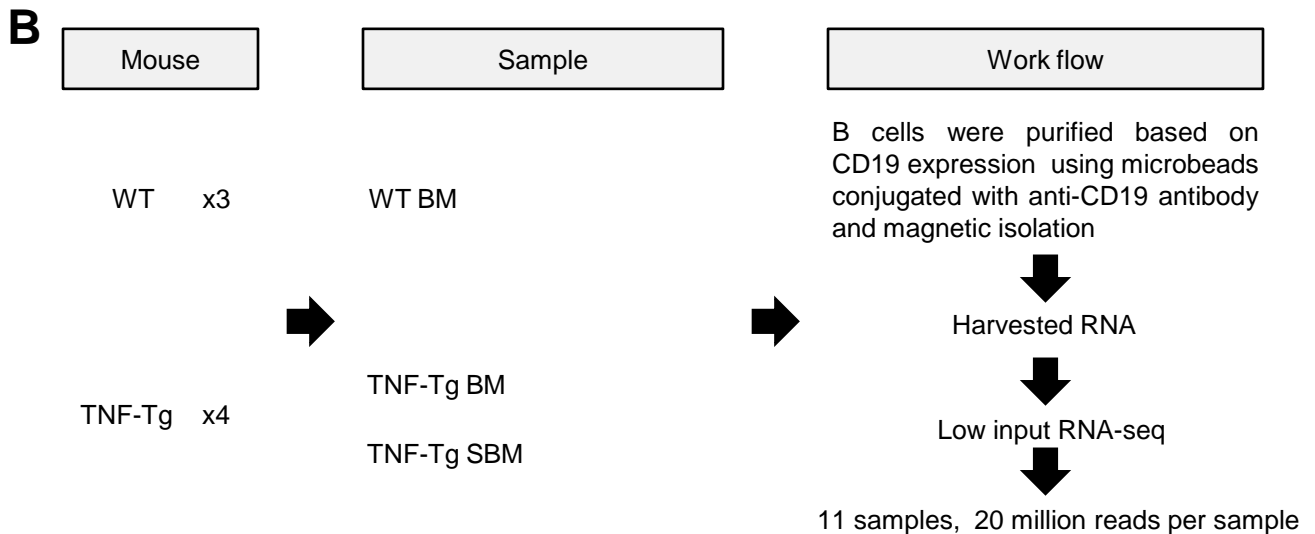

**Supplementary Fig. 12. B cells were purified with anti-CD19 beads and subjected to RNA-seq.** (A) Bone marrow (BM) cells and subchondral BM (including synovium) cells from WT or TNF-Tg mice were purified with magnetic beads conjugated with anti-CD19 Ab and analyzed by flow cytometry using anti-CD19 and anti-B220 Abs. (B) B cells were purified from 6-m-old WT BM (WT BM), TNF-Tg BM (TNF-Tg BM) and TNF-Tg subchondral BM including synovium (TNF-Tg SBM) with anti-CD19 beads. Following purification, RNA was harvested and subjected to low input RNA-seq. Workflow is shown. RNA-seq was performed once with 3 or 4 mice in each group.

# Supplementary Figure 13

Raw data of Immunoblotting from Figure 3F.

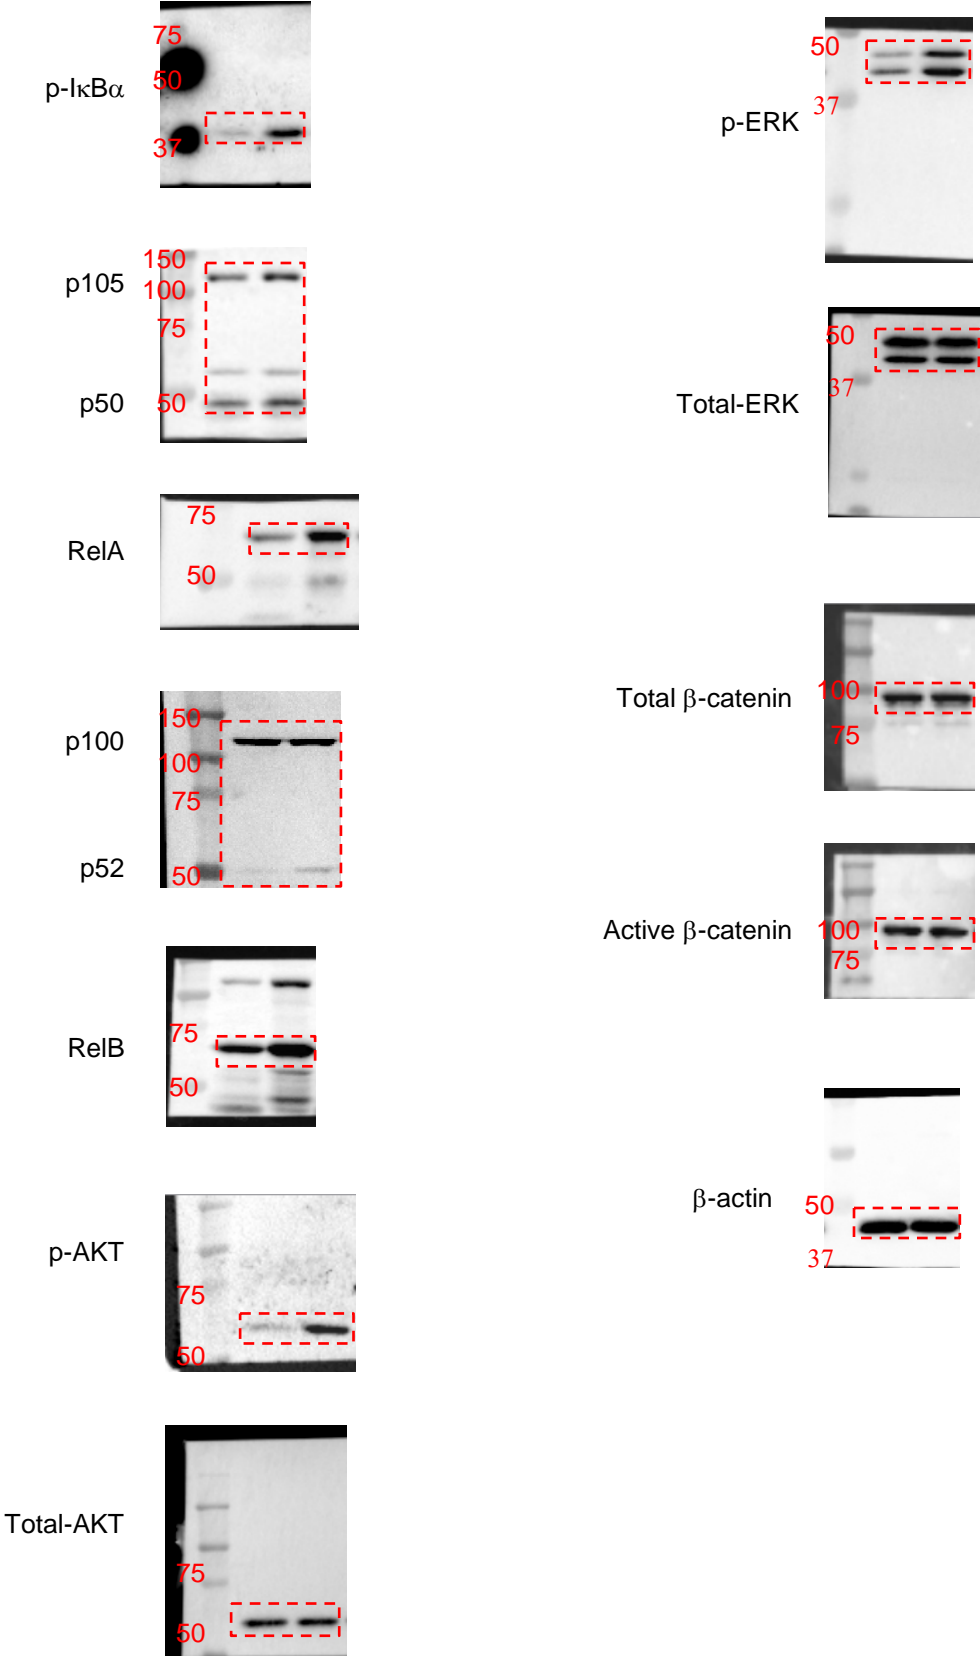

# Supplementary Figure 14

Raw data of Immunoblotting from Figure 4B & C.

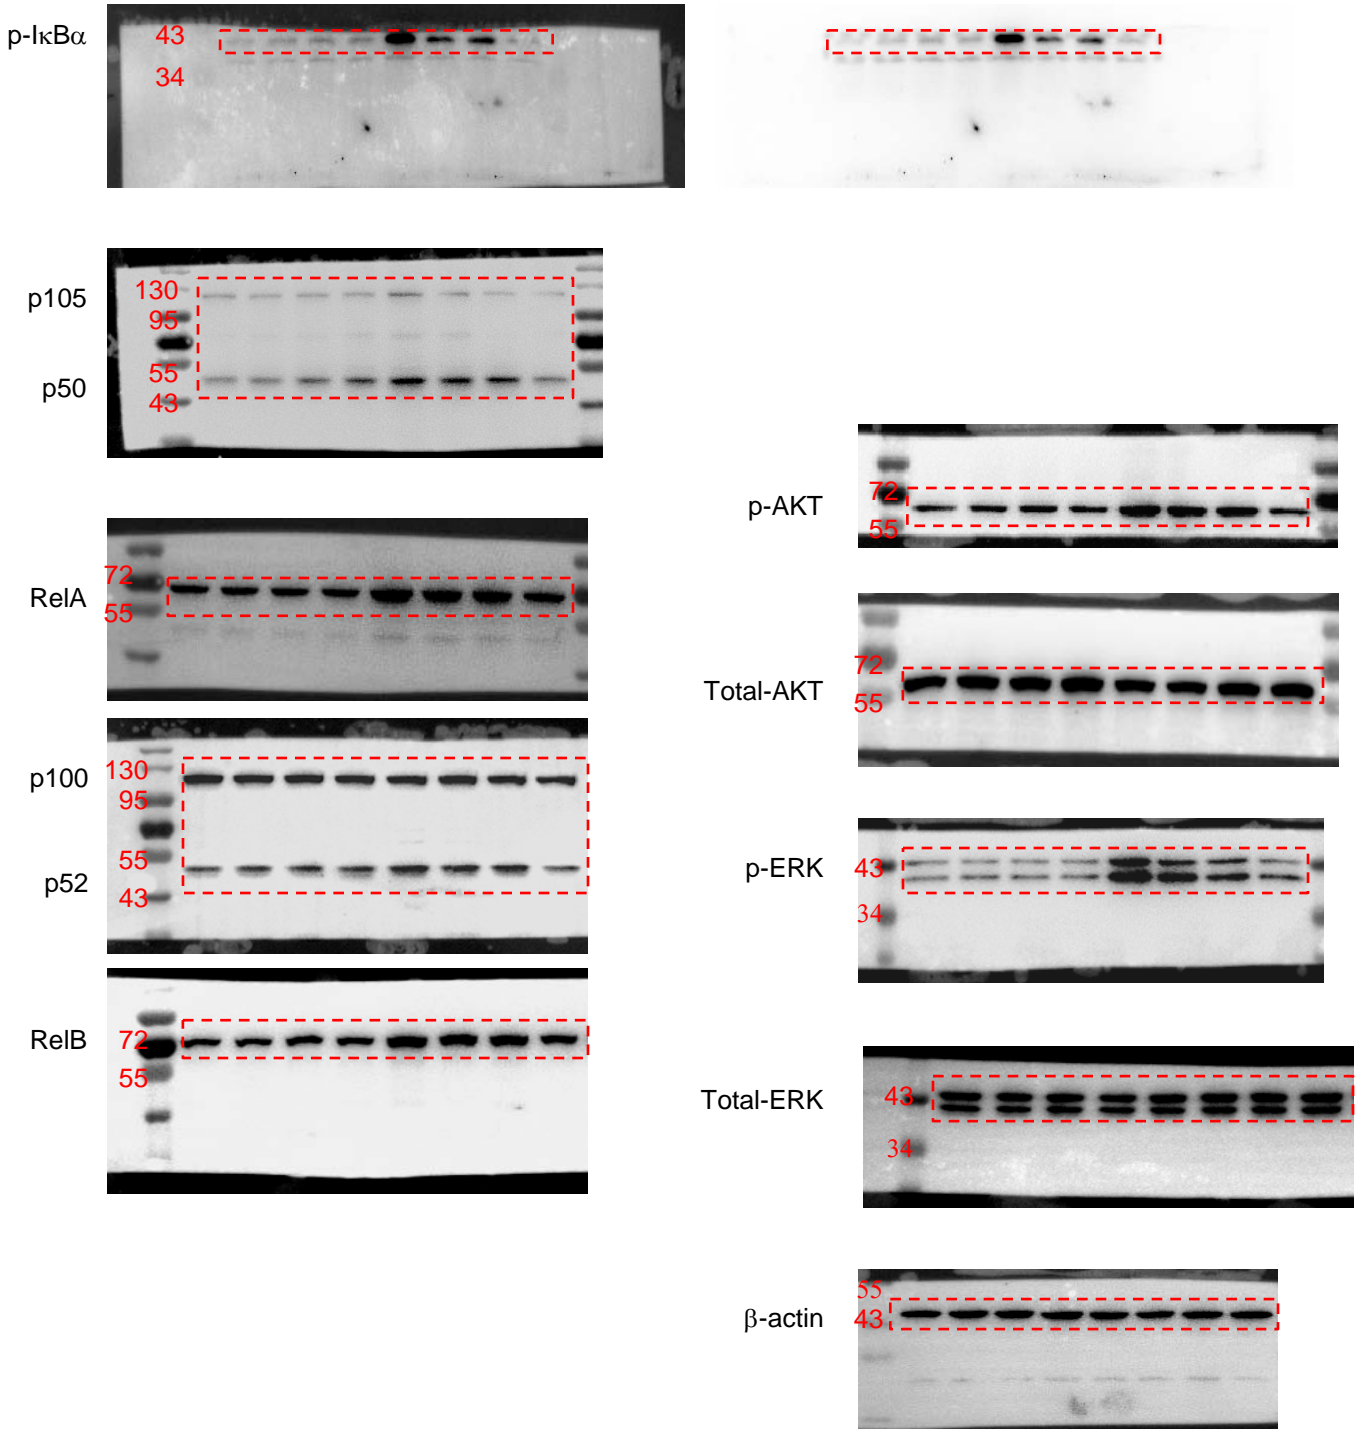

# Supplementary Table 1

The 30 most differentially expressed genes for TNF-Tg SBM B cells vs. TNF-Tg BM B cells

| RANK      | Gene Symbol | Description                                                    | Fold Change | p value         |
|-----------|-------------|----------------------------------------------------------------|-------------|-----------------|
| 1         | Cxcl3       | chemokine (C-X-C motif) ligand 3                               | 12.25       | 0               |
| 2         | Cxcl2       | chemokine (C-X-C motif) ligand 2                               | 11.54       | 0               |
| 3         | Fxyd2       | FXYD domain-containing ion transport regulator 2               | 10.50       | 0               |
| 4         | Mmp3        | matrix metalloproteinase 3                                     | 10.30       | 0               |
| 5         | Ecm1        | extracellular matrix protein 1                                 | 9.57        | 0               |
| 6         | Cxcl1       | chemokine (C-X-C motif) ligand 1                               | 9.38        | 8.34E-12        |
| 7         | Arg1        | arginase 1                                                     | 9.22        | 0               |
| 8         | Cav1        | caveolin 1                                                     | 8.92        | 0               |
| 9         | Mmp12       | matrix metalloproteinase 12                                    | 8.60        | 3.52E-13        |
| 10        | Anxa8       | annexin A8                                                     | 8.34        | 0               |
| 11        | Saa3        | serum amyloid A 3                                              | 8.34        | 0               |
| 12        | Col3a1      | collagen, type III, alpha 1                                    | 8.11        | 0               |
| 13        | Dpep3       | dipeptidase 3                                                  | 8.09        | 0               |
| 14        | Irg1        | immunoresponsive 1 homolog                                     | 7.87        | 0               |
| 15        | Dpep2       | dipeptidase 2                                                  | 7.84        | 0               |
| 16        | Ctsk        | cathepsin K                                                    | 7.41        | 0               |
| 17        | Tpp3        | tubulin polymerization-promoting protein family member 3       | 7.21        | 0               |
| <b>18</b> | <b>Ccl3</b> | <b>chemokine (C-C motif) ligand 3</b>                          | <b>7.21</b> | <b>9.84E-13</b> |
| 19        | Il1b        | interleukin 1 beta                                             | 7.18        | 0               |
| 20        | Ccdc109b    | mitochondrial calcium uniporter dominant negative beta subunit | 6.99        | 0               |
| 21        | Cxcl13      | chemokine (C-X-C motif) ligand 13                              | 6.98        | 9.39E-14        |
| 22        | Clec4e      | C-type lectin domain family 4, member e                        | 6.92        | 0               |
| <b>23</b> | <b>Tnf</b>  | <b>tumor necrosis factor</b>                                   | <b>6.92</b> | <b>4.86E-14</b> |
| 24        | Clec4d      | C-type lectin domain family 4, member d                        | 6.77        | 0               |
| 25        | Havcr2      | hepatitis A virus cellular receptor 2                          | 6.76        | 0               |
| 26        | Ccl7        | chemokine (C-C motif) ligand 7                                 | 6.63        | 8.12E-12        |
| 27        | S100a4      | S100 calcium binding protein A4                                | 6.62        | 0               |
| 28        | Spp1        | secreted phosphoprotein 1                                      | 6.56        | 0               |
| 29        | Lum         | lumican                                                        | 6.51        | 4.36E-11        |
| 30        | Ccl4        | chemokine (C-C motif) ligand 4                                 | 6.48        | 0               |

**Supplementary Table 1. The 30 most differentially expressed genes for TNF-Tg SBM B cells vs. TNF-Tg BM B cells from RNA-seq. The genes were ranked by fold-change.**

## Supplementary Table 2

The 30 most differentially expressed genes for TNF-Tg BM B cells vs. WT BM B cells

| RANK | Gene Symbol | Description                                                  | Fold Change | p value  |
|------|-------------|--------------------------------------------------------------|-------------|----------|
| 1    | Marco       | macrophage receptor with collagenous structure               | 11.8115     | 3.52E-13 |
| 2    | Liph        | lipase, member H                                             | 6.4426      | 6.22E-06 |
| 3    | Madcam1     | mucosal vascular addressin cell adhesion molecule 1          | 5.70067     | 6.85E-07 |
| 4    | Tppp3       | tubulin polymerization-promoting protein family member 3     | 5.47954     | 6.32E-07 |
| 5    | Aplnr       | apelin receptor                                              | 5.20627     | 3.26E-06 |
| 6    | Rap1gap2    | RAP1 GTPase activating protein 2                             | 4.94378     | 8.83E-06 |
| 7    | Gpnmb       | glycoprotein (transmembrane) nmb                             | -4.83397    | 0        |
| 8    | Apoc1       | apolipoprotein C-I                                           | 4.35723     | 7.38E-05 |
| 9    | C3          | complement component 3                                       | 4.09893     | 3.5E-11  |
| 10   | Cd300e      | CD300E molecule                                              | 3.69617     | 1.12E-05 |
| 11   | Fpr-rs4     | formyl peptide receptor, related sequence 4                  | 3.55737     | 7.94E-06 |
| 12   | Fpr1        | formyl peptide receptor 1                                    | 3.53647     | 1.99E-11 |
| 13   | Clec5a      | C-type lectin domain family 5, member a                      | 3.36941     | 4.84E-06 |
| 14   | Atp6v0d2    | ATPase, H <sup>+</sup> transporting, lysosomal V0 subunit D2 | -3.35399    | 5.87E-06 |
| 15   | Ifitm6      | interferon induced transmembrane protein 6                   | 3.19212     | 1.65E-07 |
| 16   | Hp          | haptoglobin                                                  | 3.15671     | 1.37E-10 |
| 17   | Fpr3        | formyl peptide receptor 3                                    | 3.04872     | 6.88E-07 |
| 18   | Fpr2        | formyl peptide receptor 2                                    | 2.98473     | 3.55E-07 |
| 19   | Mrgpra6     | MAS-related GPR, member A6                                   | 2.96882     | 4.04E-05 |
| 20   | Mrgpra9     | Mrgpra9 MAS-related GPR, member A9                           | 2.96618     | 1.66E-05 |
| 21   | Lcn2        | lipocalin 2                                                  | 2.9627      | 1.58E-08 |
| 22   | Mrgpra2a    | Mrgpra2a MAS-related GPR, member A2A                         | 2.94803     | 2.62E-06 |
| 23   | Mrgpra1     | Mrgpra1 MAS-related GPR, member A1                           | 2.92765     | 1.69E-05 |
| 24   | Mrgpra2b    | Mrgpra2b MAS-related GPR, member A2B                         | 2.92626     | 2.94E-06 |
| 25   | Mrgpra3     | MAS-related GPR, member A3                                   | 2.88094     | 5.92E-05 |
| 26   | Mrgpra4     | Mrgpra4 MAS-related GPR, member A4                           | 2.87229     | 3.35E-05 |
| 27   | Chi3l3      | chitinase-like 3                                             | 2.75127     | 1.04E-07 |
| 28   | Vsig4       | V-set and immunoglobulin domain containing 4                 | 2.6962      | 3.53E-06 |
| 29   | Chi3l4      | chitinase 3-like 4                                           | 2.6958      | 2.03E-07 |
| 30   | Cd177       | CD177 antigen                                                | 2.64779     | 1.76E-07 |

**Supplementary Table 2. The 30 most differentially expressed genes for TNF-Tg BM B cells vs. WT BM B cells from RNA-seq. The genes were ranked by fold-change.**

## Supplementary Table 3

Sequence of qPCR primers.

| Name   | F/R | Sequences                      |
|--------|-----|--------------------------------|
| mCCL3  | F   | 5' AAGGATACAAGCAGCAGCGAGTA 3'  |
|        | R   | 5' TGCAGAGTGTCATGGTACAGAGAA 3' |
| mTNF   | F   | 5' CACTCAGATCATCTTCTCAA 3'     |
|        | R   | 5' AGTAGACAAGGTACAACCCATC 3'   |
| mDkk3  | F   | 5' CTCGGGGGTATTTTGCTGTGT 3'    |
|        | R   | 5' TCCTCCTGAGGGTAGTTGAGA 3'    |
| mRunx2 | F   | 5'CAAGAAGGCTCTGGCGTTTA3'       |
|        | R   | 5'TGCAGCCTTAAATGACTCGG3'       |
| mALP   | F   | 5'CTTGCTGGTGAAGGAGGCAGG3'      |
|        | R   | 5'CACGTCTTCTCCACCGTGGGTC3'     |
| mGapdh | F   | 5' GGTCGGTGTGAACGGATTTG 3'     |
|        | R   | 5' ATGAGCCCTTCCACAATG 3'       |
| hCCL3  | F   | 5' AGTTCTCTGCATCACTTGCTG 3'    |
|        | R   | 5' CGGCTTCGCTTGTTAGGAA 3'      |
| hTNF   | F   | 5' CCTCTCTCTAATCAGCCCTCTG 3'   |
|        | R   | 5' GAGGACCTGGGAGTAGATGAG 3'    |
| hRunx2 | F   | 5' TCAACGATCTGAGATTTGTGGG 3'   |
|        | R   | 5' GGTCAAGGTGAAACTCTTGCC 3'    |
| hALP   | F   | 5' AACATCAGGGACATTGACGTG 3'    |
|        | R   | 5' GTATCTCGGTTTGAAGCTTTCC 3'   |
| hGapdh | F   | 5' AAGGTGAAGGTCGGAGTCAAC 3'    |
|        | R   | 5' GGGGTCATTGATGGCAACAATA 3'   |
